# Supplementary material for: Resveratrol Increases Bone Mineral Density and Bone Alkaline Phosphatase in Obese Men: A Randomized Placebo-Controlled Trial
Source: Oxford University Press journal article supplement (doi:10.1210/jc.2014-2799), 2014-10-16
Supplement: jc-14-2799.pdf [file jc-14-2799.pdf]

**Supplemental Table 1**  
**Biochemical analyses**

| Analysis             | Method                         | CV  |
|----------------------|--------------------------------|-----|
| <b>S-BAP</b>         | Enzymatic, ELISA               | 10% |
| <b>P-Osteocalcin</b> | Sandwich immunometric assay    | 3%  |
| <b>P-P1NP</b>        | Sandwich immunometric assay    | 4%  |
| <b>P-CTx</b>         | Sandwich immunometric assay    | 5%  |
| <b>S-NTx</b>         | Competitive immunometric assay | 10% |

**Supplemental Table 2**  
**Biochemical changes (relative to placebo)**

|                          | wk 4       | RSV <sub>low</sub><br>wk 8 | wk 16      | wk 4       | RSV <sub>high</sub><br>wk 8 | wk16       |
|--------------------------|------------|----------------------------|------------|------------|-----------------------------|------------|
| <b>OPG, pmol/l</b>       | -0.2 ± 0.4 | 0.4 ± 0.3                  | -0.2 ± 0.3 | 0.3 ± 0.4  | 0.1 ± 0.3                   | -0.2 ± 0.3 |
| <b>NTx, nmol/l</b>       | 1.0 ± 0.8  | 0.2 ± 0.7                  | 0.5 ± 0.8  | 0.8 ± 0.8  | -0.3 ± 0.9                  | -0.1 ± 1.3 |
| <b>U-Ca, mmol/l</b>      | 0.1 ± 0.6  | -0.1 ± 0.7                 | -0.1 ± 0.5 | 0.9 ± 0.5  | -0.4 ± 0.5                  | 0.0 ± 0.6  |
| <b>ALT, U/l</b>          | 1.8 ± 3.3  | 3.2 ± 3.8                  | 5.5 ± 4.7  | 4.6 ± 4.1  | 3.0 ± 4.5                   | 4.0 ± 4.6  |
| <b>Bilirubin, µmol/l</b> | 0.6 ± 0.9  | -0.3 ± 0.9                 | 0.9 ± 1.1  | 0.9 ± 1.0  | -0.5 ± 0.9                  | 1.3 ± 0.9  |
| <b>Creatinin, µmol/l</b> | 1.6 ± 1.8  | 2.3 ± 1.7                  | 1.4 ± 1.4  | -0.2 ± 1.9 | -0.2 ± 2.0                  | 0.2 ± 1.5  |

Data are expressed as mean ± SEM. Differences between groups were evaluated by unpaired Students t-test, and no significant differences were found.
